# Supplementary material for: Enhanced antimicrobial treatment by a clay-based drug nanocarrier conjugated to a guanidine-rich cell penetrating peptide
Source: Royal Society of Chemistry journal article supplement (doi:10.1039/d1ra07821f), 2021-01-01
Supplement: d1ra07821f2.pdf [file d1ra07821f2.pdf]

## Supporting Information

### Enhanced Antimicrobial Treatment by a Clay-Based Drug Nanocarrier Conjugated to a Guanidine-Rich Cell Penetrating Peptide

Mohammad Reza Khodabakhshi, Mohammad Hadi Baghersad\*

Applied Biotechnology Research Center, Baqiyatallah University of Medical Sciences

\*Corresponding author. E-mail address: [Hadibaghersad@bmsu.ac.ir](mailto:Hadibaghersad@bmsu.ac.ir) (M.H. Baghersad).

#### Table of content

| Content                                                                                                                                                                                                                        | Page       |
|--------------------------------------------------------------------------------------------------------------------------------------------------------------------------------------------------------------------------------|------------|
| <b>Table S1.</b> The chemicals used in the project.                                                                                                                                                                            | <b>S2</b>  |
| <b>Table S2.</b> The instruments used in the project.                                                                                                                                                                          | <b>S3</b>  |
| <b>Figure S1.</b> The LC-MS result of the synthesis peptide sequence.                                                                                                                                                          | <b>S4</b>  |
| <b>Figure S2.</b> EDX spectra and quantitative tables of the raw materials and products.                                                                                                                                       | <b>S5</b>  |
| <b>Figure S3.</b> DLS curves of HNTs.                                                                                                                                                                                          | <b>S6</b>  |
| <b>Estimation of drug content</b>                                                                                                                                                                                              | <b>S7</b>  |
| <b>Figure S4.</b> OD <sub>600</sub> experiment: growth inhibition effects of individual VCM and OFX, and nanocargoes on 3T3 fibroblast human normal cells.                                                                     | <b>S8</b>  |
| <b>Figure S5.</b> Disk counter experiment: digital photos of the dishes including <i>S. aureus</i> bacteria and VCM@Fe <sub>3</sub> O <sub>4</sub> /HNT-C(WR) <sub>3</sub> nanocargo in LB Broth medium, over 24 h incubation. | <b>S9</b>  |
| <b>Figure S6.</b> DLS spectrum of the dispersed VCM@Fe <sub>3</sub> O <sub>4</sub> /HNT-C(WR) <sub>3</sub> nanocargoes in HAS (25%) in the simulated circulatory system, after 15 minutes.                                     | <b>S10</b> |
| <b>Figure S7.</b> DLS spectrum of the dispersed VCM@Fe <sub>3</sub> O <sub>4</sub> /HNT-C(WR) <sub>3</sub> nanocargoes in HAS (25%) in the simulated circulatory system, after 30 minutes.                                     | <b>S11</b> |
| <b>Figure S8.</b> DLS spectrum of the dispersed VCM@Fe <sub>3</sub> O <sub>4</sub> /HNT-C(WR) <sub>3</sub> nanocargoes in HAS (25%) in the simulated circulatory system, after 60 minutes.                                     | <b>S12</b> |

**Table S1.** The used chemicals in this project.

| Material                                                        | Brand & Purity                             |
|-----------------------------------------------------------------|--------------------------------------------|
| Solvents                                                        | Merck                                      |
| Halloysite nanoclay                                             | Sigma-Aldrich                              |
| FeCl <sub>2</sub> .4H <sub>2</sub> O                            | Sigma-Aldrich, ≥98.0%                      |
| FeCl <sub>3</sub> .6H <sub>2</sub> O                            | Sigma-Aldrich, ≥97.0%                      |
| (3-Mercaptopropyl)trimethoxysilane                              | Sigma-Aldrich, 95.0%                       |
| Vancomycin                                                      | Sigma-Aldrich                              |
| Ofloxacin                                                       | Sigma-Aldrich                              |
| 2-Chlorotriyl chloride (CTC) resin                              | Sigma-Aldrich                              |
| Hydrogen peroxide (30 wt%)                                      | Merck                                      |
| TBTU                                                            | Sigma-Aldrich                              |
| N,N-Diisopropylethylamine                                       | Sigma-Aldrich, ≥99.0%                      |
| Piperidine                                                      | Sigma-Aldrich, ≥99.0%                      |
| Trifluoroacetic acid                                            | Sigma-Aldrich, ≥99.0%                      |
| Triethyl silane                                                 | Sigma-Aldrich, 98%                         |
| Fmoc-Trp(Trt)-OH                                                | Sigma-Aldrich, ≥98.0%                      |
| Fmoc-Arg(Pbf)-OH                                                | Sigma-Aldrich, ≥98.0%                      |
| Fmoc-Cys(Trt)-OH                                                | Sigma-Aldrich, ≥98.0%                      |
| Bacteria cell lines                                             | S. aureus-ATCC 12600 and E. coli-ATCC 9637 |
| 3T3 fibroblast cells                                            | Iranian Biological Resource Center         |
| HAS (25%)                                                       | Octapharma (Vienna, Austria)               |
| Crystal violet (tris(4-(dimethylamino)phenyl)methylum chloride) | Merck, ≥90.0%                              |
| Dulbecco's modified Eagle's medium (DMEM)                       | Sigma-Aldrich                              |

**Table S2.** The used equipment in this project.

| Equipment                   | Brand                                                                    |
|-----------------------------|--------------------------------------------------------------------------|
| Ball-mill                   | Amin Asia Fanavar Pars Co. (IRAN)                                        |
| Furnace                     | Carrier Furnace Units                                                    |
| Autoclave for sterilization | Reyhan Teb, 2KW-220v                                                     |
| Thermometer                 | Fluke (572-2 infrared)                                                   |
| Ultrasound probe            | Hielscher (UP100H)                                                       |
| Ultrasound bath             | Steelco US 80                                                            |
| Centrifuge                  | Beckman Coulter GmbH                                                     |
| Vacuum oven                 | IQS Directory                                                            |
| Oven                        | Genlab Ltd                                                               |
| Vortex mixer                | OHAUS Europe GmbH                                                        |
| Freeze drier                | KASSEL Machinery (Zhejiang) Co.,Ltd                                      |
| Rotary evaporator           | Heidolph Instruments GmbH & Co. KG                                       |
| Vacuum pump                 | Amila Automation Technology Suzhou Co,Ltd manufacturer                   |
| FTIR spectroscopy           | Shimadzu FTIR-8400S                                                      |
| EDX spectroscopy            | VEGA-TESCAN-XMU                                                          |
| FESEM                       | Hitachi S-5200                                                           |
| TEM                         | Philips CM200                                                            |
| TGA                         | TGA-Bahr-STA 504, under argon                                            |
| DLS                         | Horiba (SZ-100)                                                          |
| VSM                         | Meghnatis Kavir Kashan Co., Kashan, Iran                                 |
| XRD                         | DRON-8 X-ray diffractometer                                              |
| UV-DRS                      | Shimadzu-UV-2550/220v                                                    |
| UV-vis spectroscopy         | Beckman DU640                                                            |
| LC-MS                       | Agilent 6410 Triple Quadrupole, Agilent 1200 series Santa Clara, CA, USA |
| Confocal microscopy         | Zeiss LMS 700                                                            |
| Incubator                   | Sh, Noor Sanat Ferdos                                                    |

## LC-MS ESI

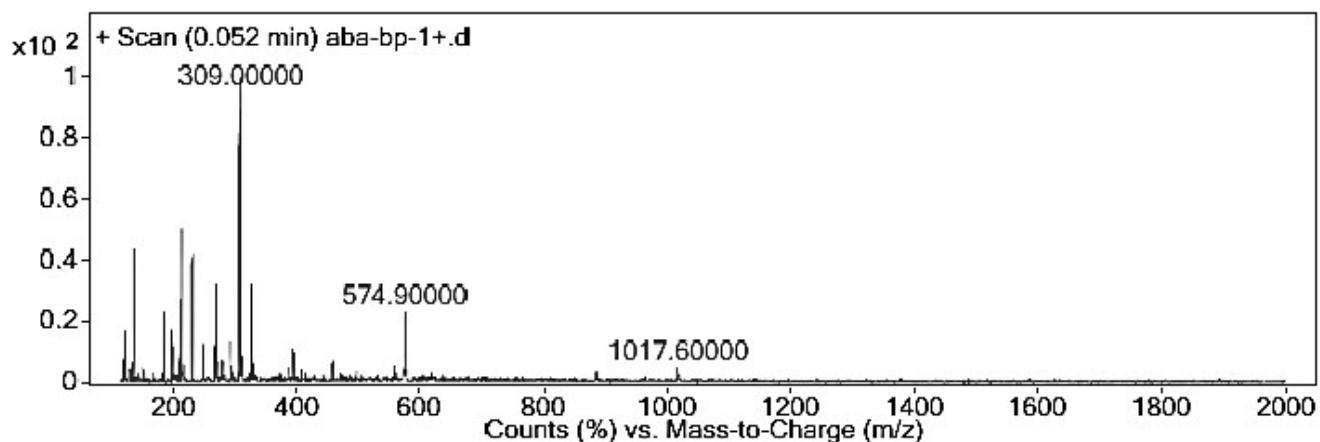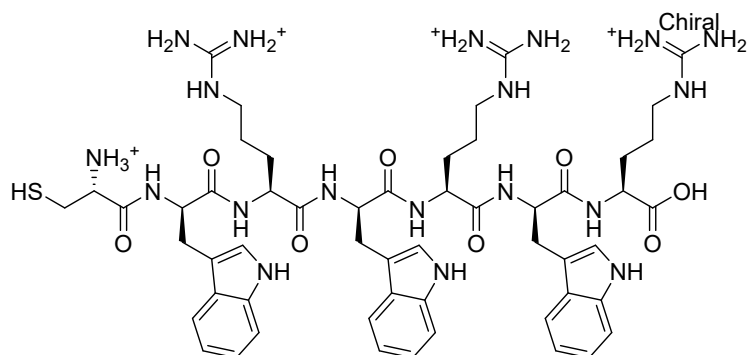

**Figure S1.** The LC-MS result of the synthesized C(WR)<sub>3</sub> peptide sequence.

### Interpretation of the LC-MS result

Since, the ESI technique in positive state (+scan) has been used, two indicative signals are expected to be seen;  $[M+1]^+$  and  $[M+2H]^{2+}/2$ . As is observed in the LC-MS spectrum, a signal at  $m/z$  574.9 has appeared that is attributed to  $[M+2H]^{2+}/2$  signal, confirming successful formation of the C(WR)<sub>3</sub> peptide sequence. Considering the MW of the C(WR)<sub>3</sub> sequence (1147.59 g/mol), the signal of  $[M+1]^+$  has not been appeared that is a common behavior for the heavy chains. In fact, this is a probable happening for the heavy chains to break down to the smaller chains upon exposure to the ionizing agent. As is observed in the spectrum, a signal at  $m/z$  309.0 has emerged, which can be ascribed to the broken small pieces.

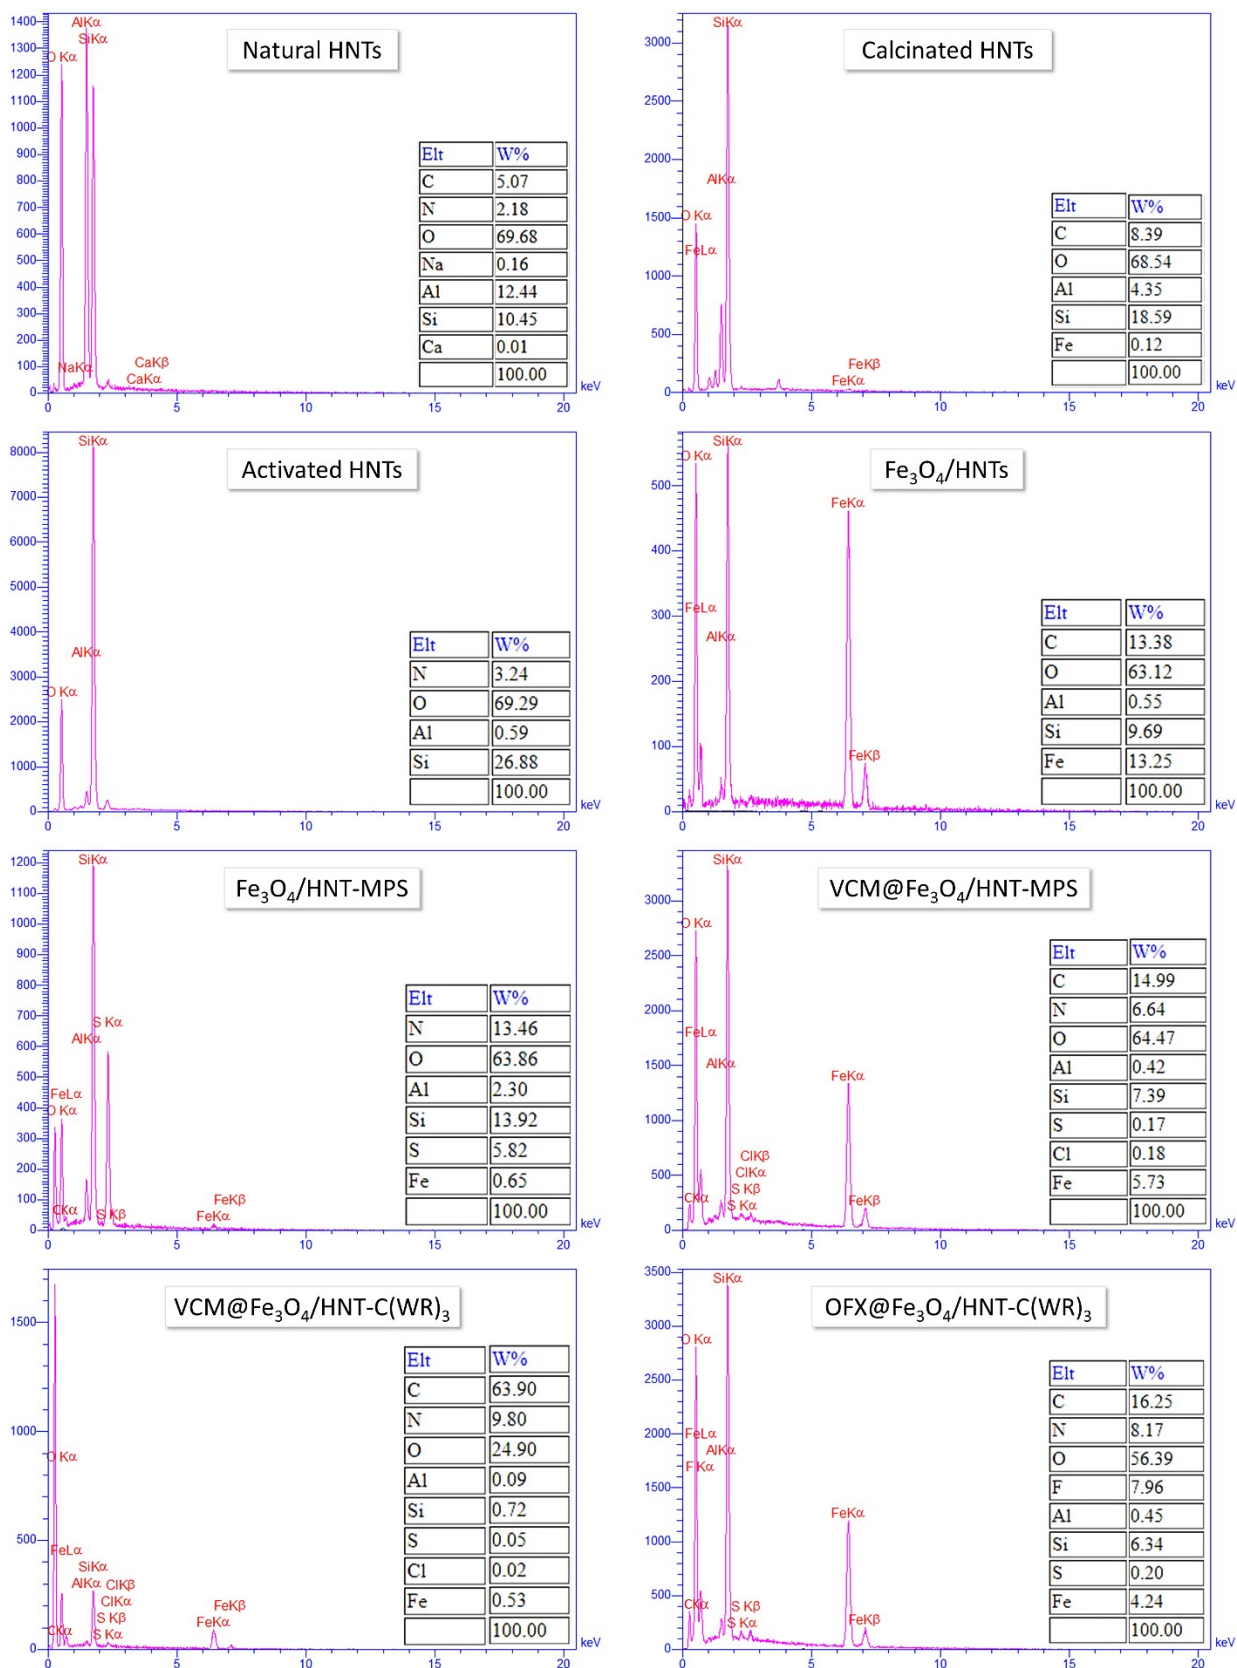

Figure S2. EDX spectra and quantitative tables of the raw materials and products.

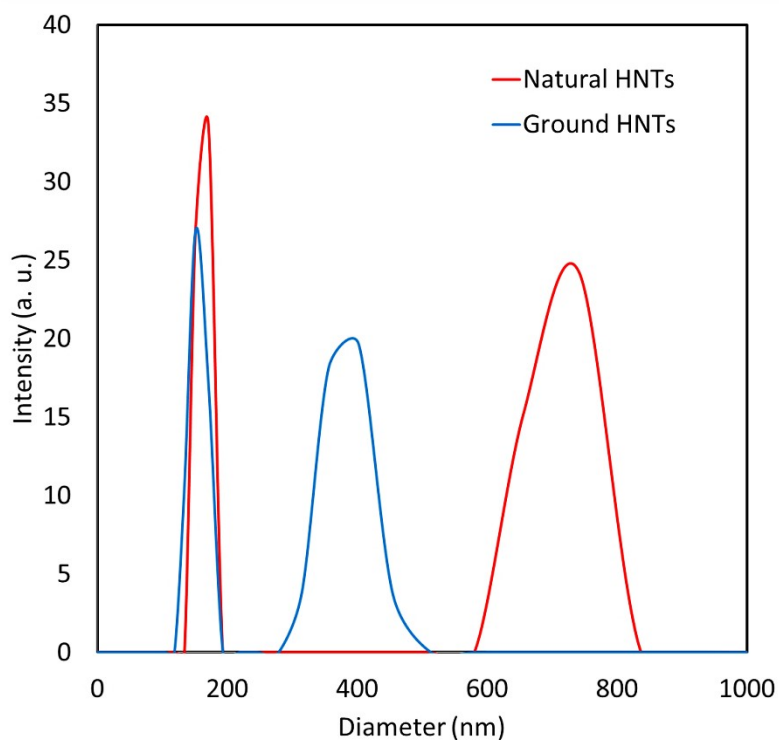

**Figure S3.** DLS curves of HNTs: the peaks with larger PDI values origin from large pieces of HNTs, and confirm well breakage into smaller pieces. As is observed, the average size of the small pieces of HNTs in the dispersed state is ca. 180 nm, and has not changed during the grinding stage.

## Estimation of drug content

For VCM: After filtration and dilution of the sample (1 to 25 mL), the UV-vis absorbance was investigated, as below:

$$A = 0.138 = y$$

From the line equation of the calibration curve;

$$X \text{ (ppm)} = y \text{ (a. u.)} - 0.0305 / 0.0135$$

$$\Rightarrow X = C \text{ (ppm)} = 7.96 \sim 8.0 \text{ ppm (concentration of VCM after dilution)}$$

$$\text{Concentration of VCM before dilution} = 8.0 \times 25 = 200 \text{ ppm} = 0.2 \text{ mg/mL}$$

$$\text{Concentration of VCM in the initial sample} = 5.0 \text{ mg}/25 \text{ mL DMSO}$$

Since, 50 mg of VCM@Fe<sub>3</sub>O<sub>4</sub>/HNT-C(WR)<sub>3</sub> was dispersed in 25 mL of DMSO, the drug content can be estimated as below:

$$\text{Drug content of VCM@Fe}_3\text{O}_4\text{/HNT-C(WR)}_3 = 5.0 / 50 \times 100 = \mathbf{10 \text{ wt\%}}$$

## The same method was passed for OFX

$$A = 0.680$$

$$\text{From line equation: } X \text{ (ppm)} = y \text{ (a. u.)} - 0.202 / 0.0498$$

$$C \text{ (ppm)} = 9.59 \sim 9.6 \text{ ppm (after dilution)}$$

$$9.6 \times 25 = 240 \text{ ppm} = 0.24 \text{ mg/mL (before dilution)}$$

$$0.24 \times 25 = 6.0 \text{ mg}/25 \text{ mL DMSO}$$

$$\text{Drug content of OFX@Fe}_3\text{O}_4\text{/HNT-C(WR)}_3 = 6.0 / 50 \times 100 = \mathbf{12 \text{ wt\%}}$$

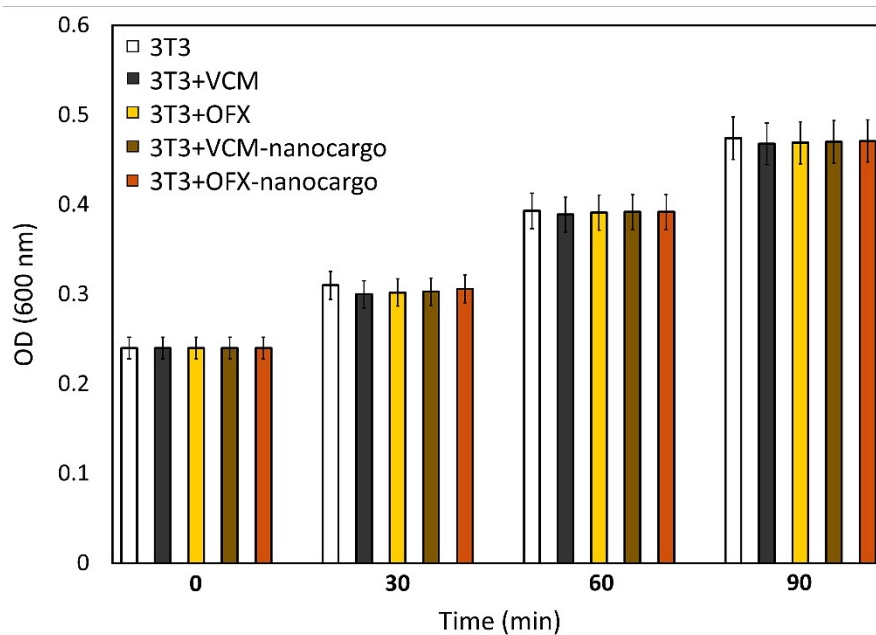

**Figure S4.**  $OD_{600}$  experiment: growth inhibition effects of individual VCM and OFX, and VCM@Fe<sub>3</sub>O<sub>4</sub>/HNT-C(WR)<sub>3</sub> and OFX@Fe<sub>3</sub>O<sub>4</sub>/HNT-C(WR)<sub>3</sub> nanocargoes on 3T3 fibroblast human normal cells. All samples have been prepared and subjected to the cells in the same concentration of 50 µg/mL (in DMEM). Ultrasonication in a bath with 50 KHz frequency and 100 W L<sup>-1</sup> power density (2 minutes, at room temperature) was performed on the heterogeneous samples to make fine dispersions. The error bars show relative error (%) for three samples of each condition (n = 3).



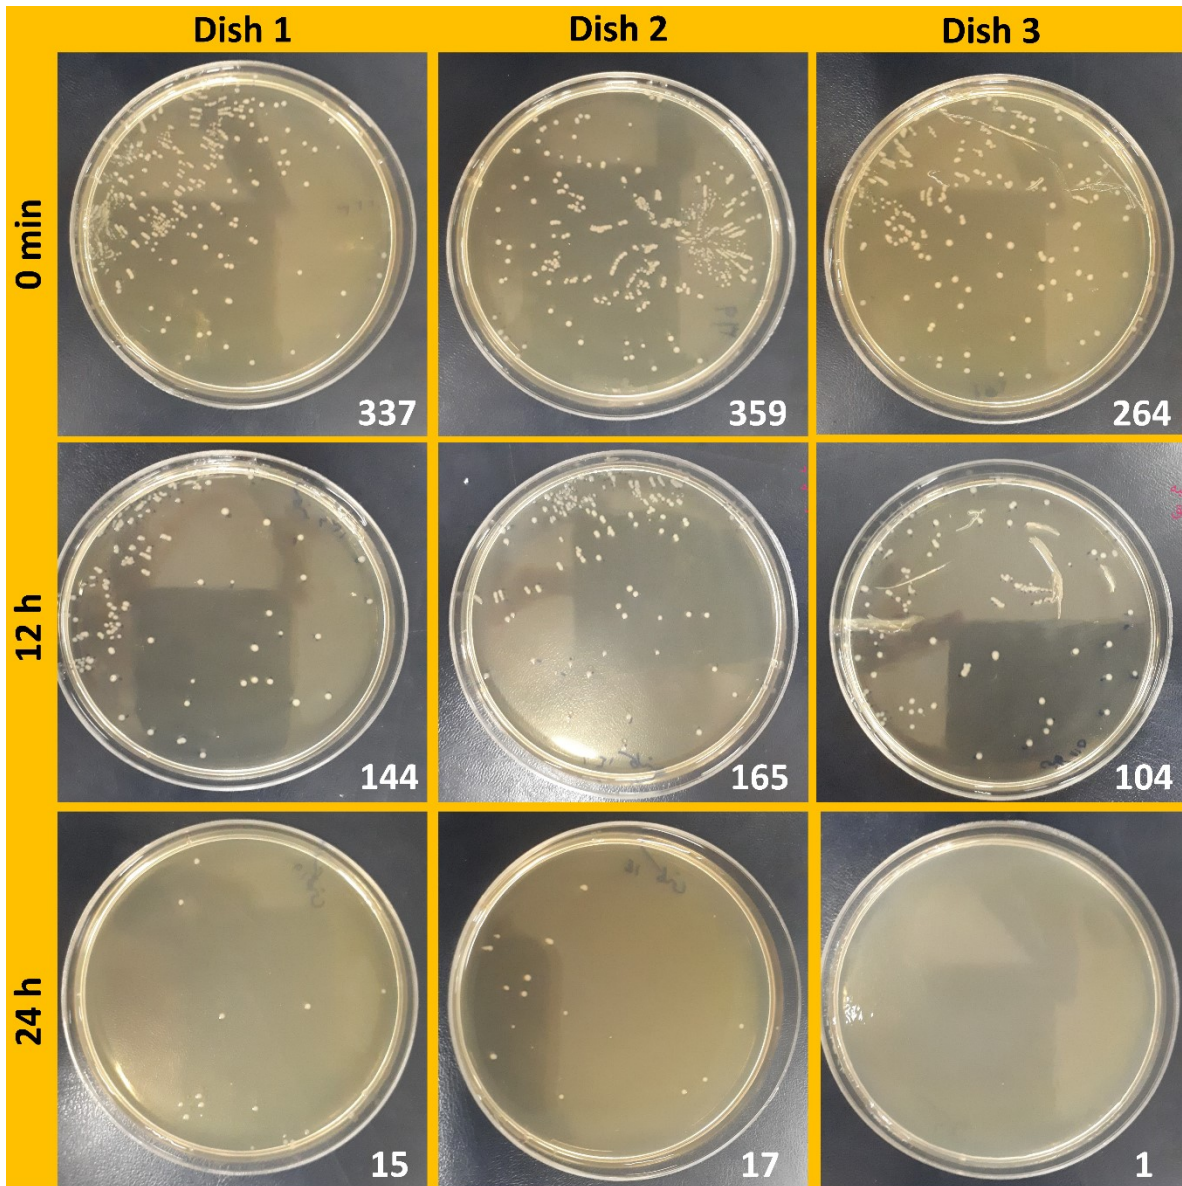

**Figure S5.** *Disk counter experiment:* digital photos of the dishes including *S. aureus* bacteria and VCM@Fe<sub>3</sub>O<sub>4</sub>/HNT-C(WR)<sub>3</sub> nanocargo in LB Broth medium, over 24 h incubation.

## Cumulant Operations

Z-Average

: 513.3 nm

PI

: 0.859

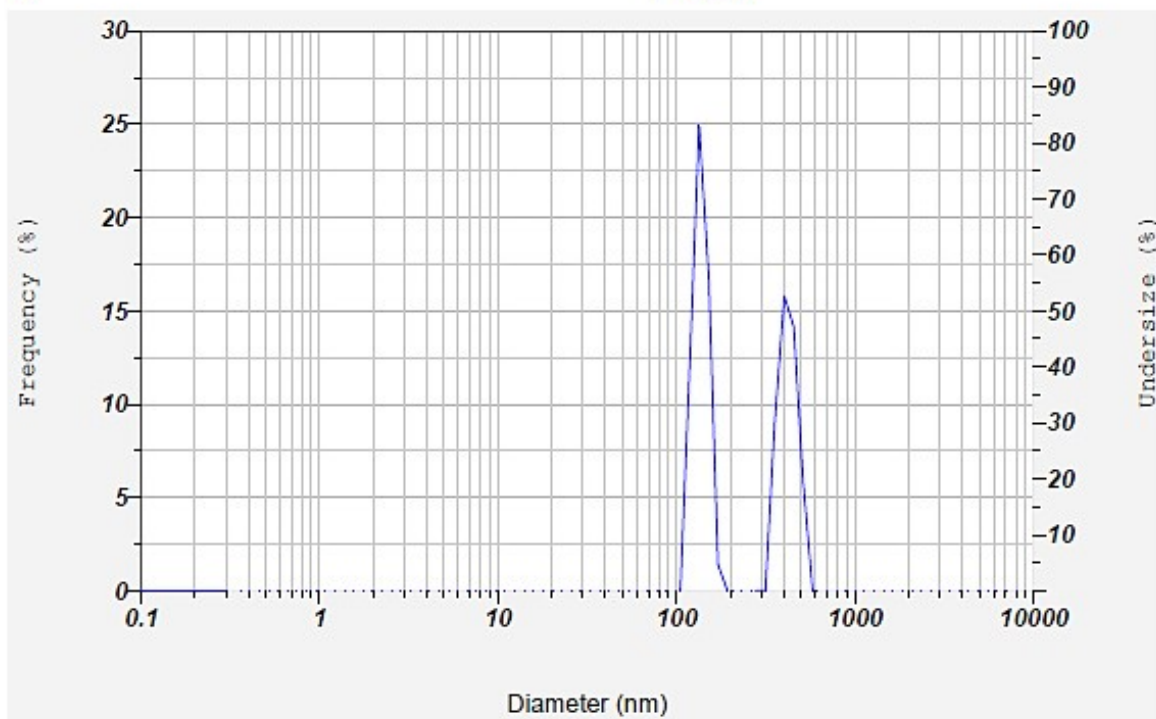

**Figure S6.** DLS spectrum of the dispersed VCM@Fe<sub>3</sub>O<sub>4</sub>/HNT-C(WR)<sub>3</sub> nanocargoes in HAS (25%) in the simulated circulatory system, after 15 minutes.

## Cumulant Operations

Z-Average

: 873.2 nm

PI

: 0.505

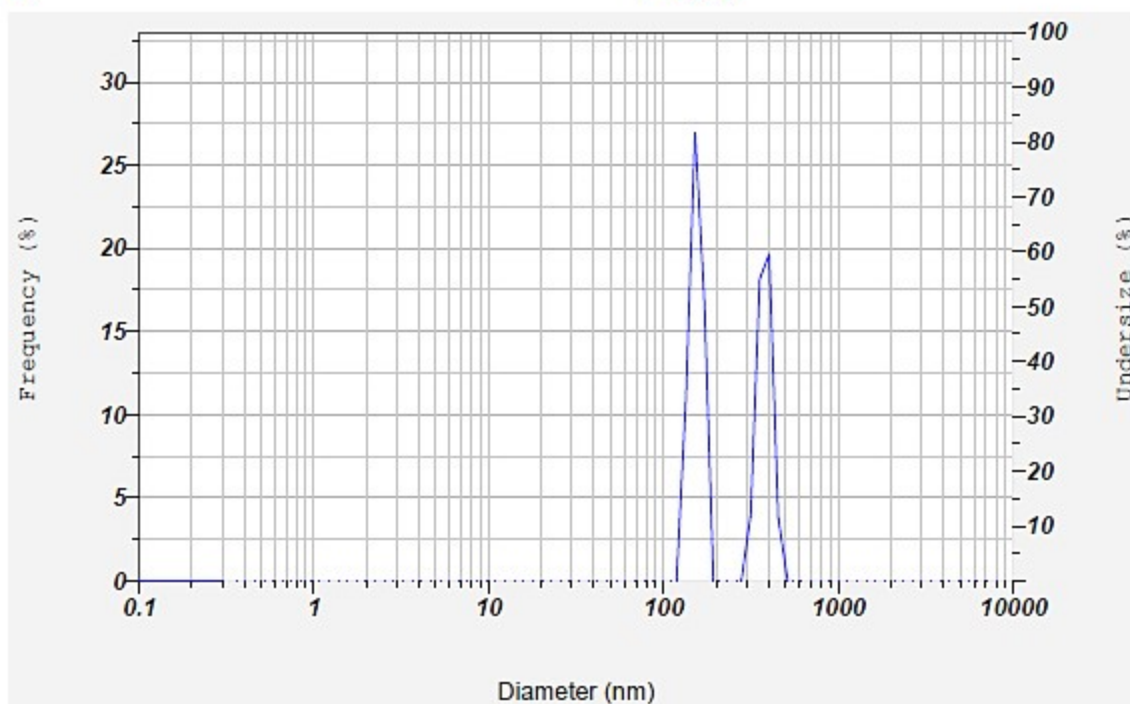

**Figure S7.** DLS spectrum of the dispersed VCM@Fe<sub>3</sub>O<sub>4</sub>/HNT-C(WR)<sub>3</sub> nanocargoes in HAS (25%) in the simulated circulatory system, after 30 minutes.

## Cumulant Operations

Z-Average

: 1355.1 nm

PI

: 0.720

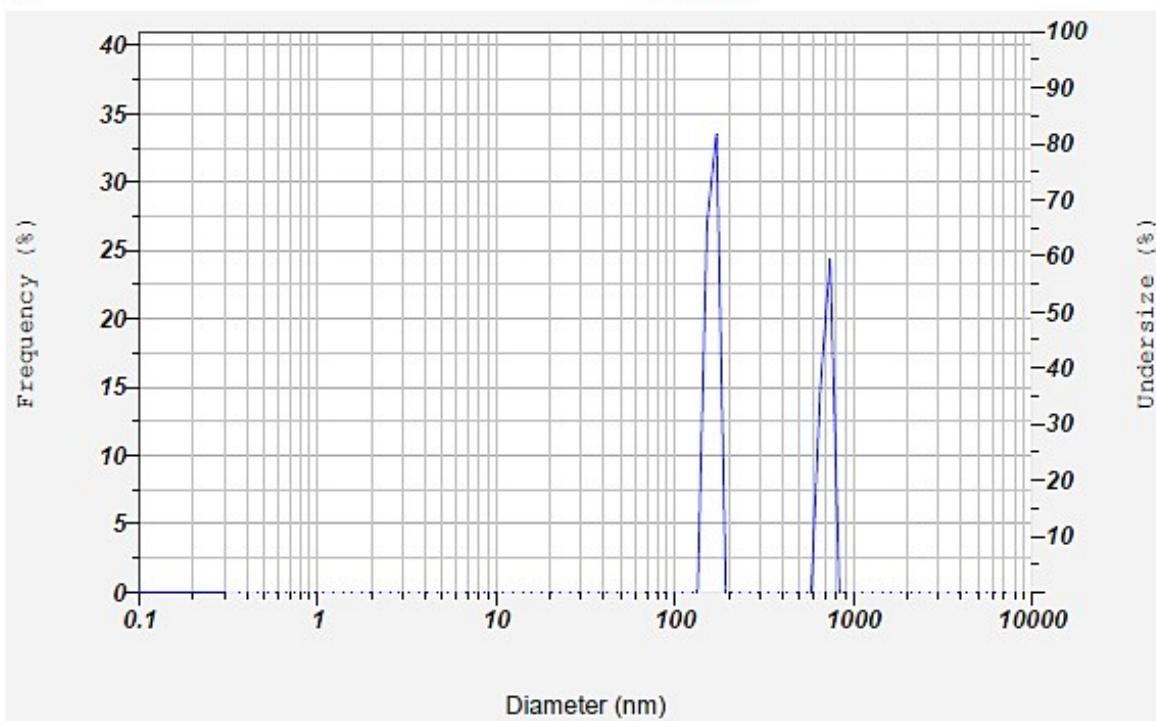

**Figure S8.** DLS spectrum of the dispersed VCM@Fe<sub>3</sub>O<sub>4</sub>/HNT-C(WR)<sub>3</sub> nanocargoes in HAS (25%) in the simulated circulatory system, after 60 minutes.
